# Supplementary material for: Immune Checkpoint Inhibitor with or without Radiotherapy in Melanoma Patients with Brain Metastases: A Systematic Review and Meta-Analysis
Source: PubMed Central journal article supplement — Korean J Radiol. 2020 Nov 26;22(4):584–95. doi: 10.3348/kjr.2020.0728 (PMC8005357; doi:10.3348/kjr.2020.0728), 2020-11-26
Supplement: kjr-22-584-s001.pdf [file kjr-22-584-s001.pdf]

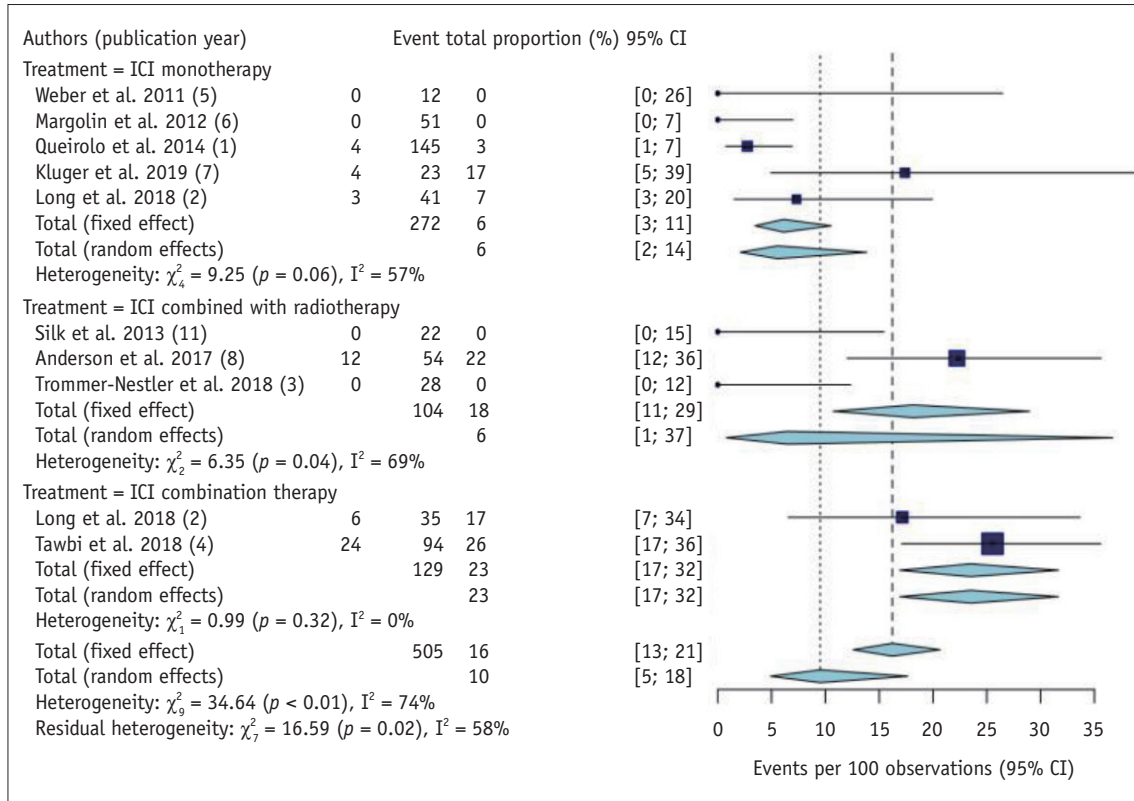

**Supplementary Fig. 1. Forest plot of the intracranial complete response rates excluding symptomatic cohorts.** CI = confidence interval, ICI = immune checkpoint inhibitor
