# Supplementary material for: Immune Checkpoint Inhibitor with or without Radiotherapy in Melanoma Patients with Brain Metastases: A Systematic Review and Meta-Analysis
Source: PubMed Central journal article supplement — Korean J Radiol. 2020 Nov 26;22(4):584–95. doi: 10.3348/kjr.2020.0728 (PMC8005357; doi:10.3348/kjr.2020.0728), 2020-11-26
Supplement: kjr-22-584-s002.pdf [file kjr-22-584-s002.pdf]

**Supplementary Table 1. Summary of Grade 3 or 4 AE**

| Study (Publication Year)              | All (%)       | CNS-Related (%) | Details of Non-CNS-Related AEs                                                                                                                                                                                                                                                                                                                                                                                                                                                                                                              | Details of CNS-Related AEs                                                                                             |
|---------------------------------------|---------------|-----------------|---------------------------------------------------------------------------------------------------------------------------------------------------------------------------------------------------------------------------------------------------------------------------------------------------------------------------------------------------------------------------------------------------------------------------------------------------------------------------------------------------------------------------------------------|------------------------------------------------------------------------------------------------------------------------|
| <b>ICI monotherapy</b>                |               |                 |                                                                                                                                                                                                                                                                                                                                                                                                                                                                                                                                             |                                                                                                                        |
| Weber et al. (2011) (5)               | -             | 2/12 (16.7)     | -                                                                                                                                                                                                                                                                                                                                                                                                                                                                                                                                           | -                                                                                                                      |
| Margolin et al. (2012) (6)            | -             | 2/72 (2.8)      | -                                                                                                                                                                                                                                                                                                                                                                                                                                                                                                                                           | -                                                                                                                      |
| Queirolo et al. (2014)* (1)           | 15/145 (10.3) | 5/145 (3.4)     | Liver toxicity (n = 4), diarrhea (n = 2), nausea (n = 1), vomiting (n = 1), asthenia (n = 1)                                                                                                                                                                                                                                                                                                                                                                                                                                                | Headache (n = 1), confusion (n = 1)                                                                                    |
| Long et al. (2018) (2)                | 6/41 (14.6)   | 2/41 (4.9)      | Hepatitis (n = 2), increased amylase (n = 1), increased ALP or $\gamma$ -GT (n = 1)                                                                                                                                                                                                                                                                                                                                                                                                                                                         | Headache (n = 1), radionecrosis (n = 1)                                                                                |
| Kluger et al. (2019) <sup>†</sup> (7) | -             | 1/23 (4.3)      | -                                                                                                                                                                                                                                                                                                                                                                                                                                                                                                                                           | Cognitive dysfunction (n = 1)                                                                                          |
| <b>ICI combined with radiotherapy</b> |               |                 |                                                                                                                                                                                                                                                                                                                                                                                                                                                                                                                                             |                                                                                                                        |
| Anderson et al. (2017) (8)            | 1/21 (4.8)    | 1/21 (4.8)      | None                                                                                                                                                                                                                                                                                                                                                                                                                                                                                                                                        | Perilesional edema (n = 1)                                                                                             |
| Nardin et al. (2018) (9)              | -             | 3/25 (12.0)     | -                                                                                                                                                                                                                                                                                                                                                                                                                                                                                                                                           | Radionecrosis (n = 3)                                                                                                  |
| Trommer-Nestler et al. (2018) (3)     | 0/13 (0)      | 0/13 (0)        | None                                                                                                                                                                                                                                                                                                                                                                                                                                                                                                                                        | None                                                                                                                   |
| <b>ICI combination therapy</b>        |               |                 |                                                                                                                                                                                                                                                                                                                                                                                                                                                                                                                                             |                                                                                                                        |
| Long et al. (2018) (2)                | 22/35 (62.9)  | 2/35 (5.7)      | Diarrhea or colitis (n = 7), hepatitis (n = 7), rash (n = 4), increased ALT or AST (n = 2), increased lipase (n = 2), hypophysitis or hypopituitarism (n = 2), nausea or vomiting (n = 1), increased amylase (n = 1), increased ALP or $\gamma$ -GT (n = 1), fatigue (n = 1), pneumonitis (n = 1), pulmonary edema (n = 1), nephritis (n = 1), increased creatinine phosphokinase (n = 1), decreased neutrophil (n = 1)                                                                                                                     | Headache (n = 1), radionecrosis (n = 1)                                                                                |
| Tawbi et al. (2018) (4)               | 56/94 (59.6)  | 7/94 (7.4)      | Increased ALT level (n = 15), increased AST level (n = 14), increased lipase level (n = 8), maculopapular rash (n = 7), colitis (n = 7), diarrhea (n = 6), increased amylase level (n = 6), hypophysitis (n = 5), fatigue (n = 4), headache (n = 3), hyperthyroidism (n = 3), nausea (n = 2), vomiting (n = 2), pneumonitis (n = 2), rash (n = 2), hypothyroidism (n = 1), decreased appetite (n = 1), anemia (n = 1), abdominal pain (n = 1), adrenal insufficiency (n = 1), increased blood bilirubin level (n = 1), hyponatremia (n = 1) | Headache (n = 3), brain edema (n = 2), intracranial hemorrhage (n = 1), peripheral neuropathy (n = 1), syncope (n = 1) |
| Tawbi et al. (2019) (10)              | 10/18 (55.6)  | 3/18 (16.7)     | -                                                                                                                                                                                                                                                                                                                                                                                                                                                                                                                                           | -                                                                                                                      |

\*Only details of treatment-related AEs were reported, <sup>†</sup>Per-patient incidence rate of grade 3 or 4 AEs was not available because only number of cases of each grade 3 or 4 AEs were reported. AE = adverse event, ALP = alkaline phosphatase, ALT = alanine transaminase, AST = aspartate transaminase, CNS = central nervous system, GT = glutamyl transferase, ICI = immune checkpoint inhibitor
