# Supplementary material for: Immune Checkpoint Inhibitor with or without Radiotherapy in Melanoma Patients with Brain Metastases: A Systematic Review and Meta-Analysis
Source: PubMed Central journal article supplement — Korean J Radiol. 2020 Nov 26;22(4):584–95. doi: 10.3348/kjr.2020.0728 (PMC8005357; doi:10.3348/kjr.2020.0728), 2020-11-26
Supplement: kjr-22-584-s004.pdf [file kjr-22-584-s004.pdf]

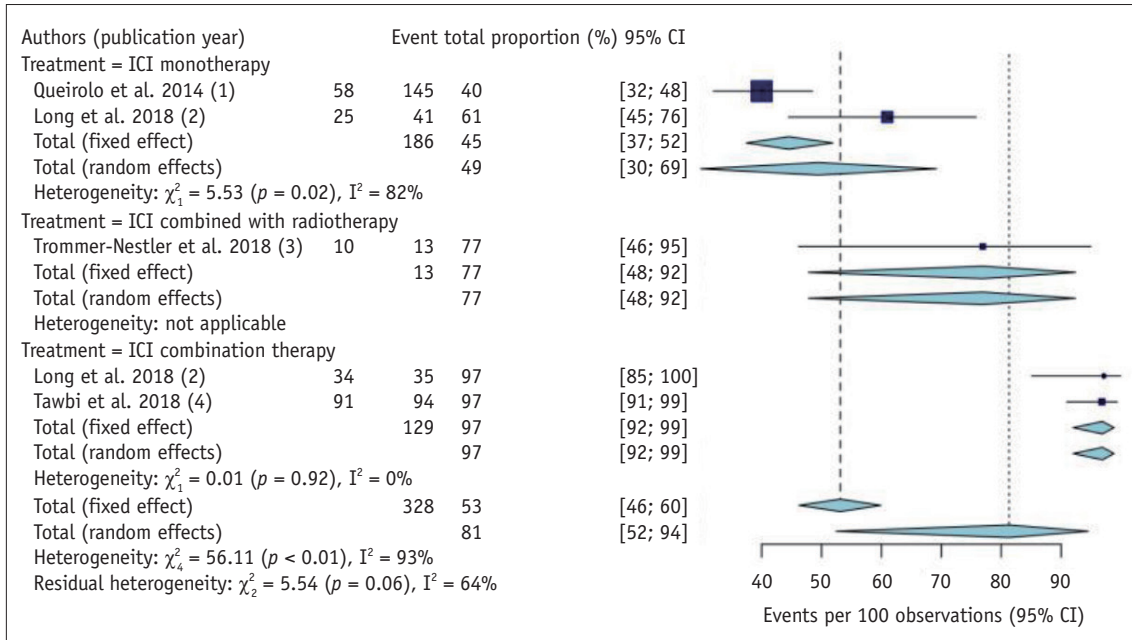

**A**

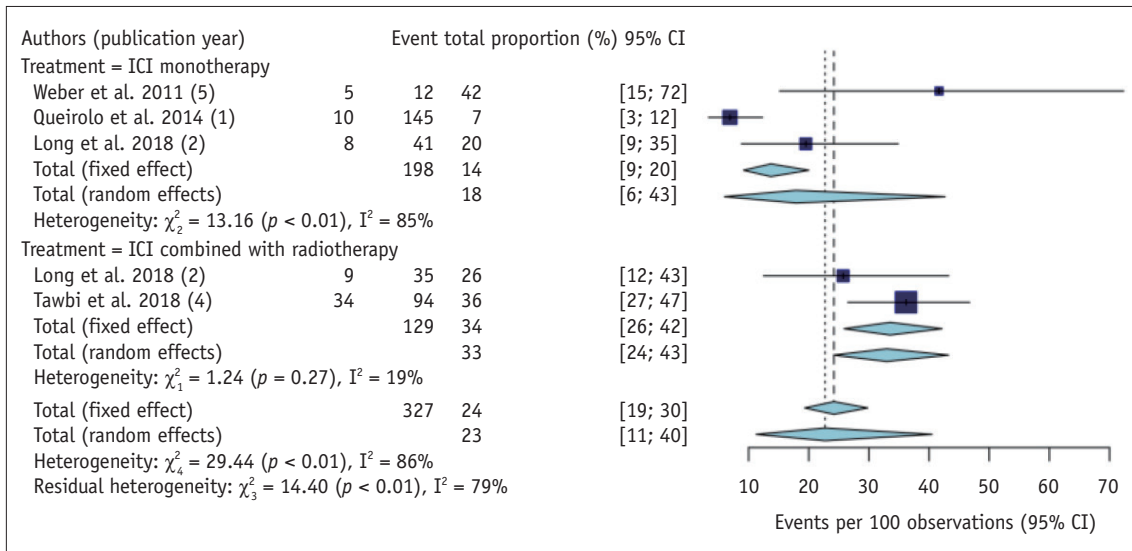

**B**

**Supplementary Fig. 2. Forest plot of the (A) any grade adverse event rates and (B) any grade CNS-related adverse event rates.**  
 CNS = central nervous system
