# Supplementary material for: Immune Checkpoint Inhibitor with or without Radiotherapy in Melanoma Patients with Brain Metastases: A Systematic Review and Meta-Analysis
Source: PubMed Central journal article supplement — Korean J Radiol. 2020 Nov 26;22(4):584–95. doi: 10.3348/kjr.2020.0728 (PMC8005357; doi:10.3348/kjr.2020.0728), 2020-11-26
Supplement: kjr-22-584-s006.pdf [file kjr-22-584-s006.pdf]

**Supplementary Table 2. Summary of Sensitivity Analysis Regarding Types of ICI**

| Outcome                  | Total      |                       | Anti-CTLA-4 |                       | Anti-PD-1  |                       | <i>P</i> |
|--------------------------|------------|-----------------------|-------------|-----------------------|------------|-----------------------|----------|
|                          | Proportion | <i>I</i> <sup>2</sup> | Proportion  | <i>I</i> <sup>2</sup> | Proportion | <i>I</i> <sup>2</sup> |          |
| Intracranial ORR         | 15 (11–20) | 0                     | 13 (9–18)   | 0                     | 19 (11–33) | 19                    | 0.28     |
| Intracranial DCR         | 26 (21–32) | 0                     | 27 (21–34)  | 0                     | 24 (15–36) | 0                     | 0.62     |
| Intracranial CR          | 6 (2–15)   | 57                    | 3 (1–6)     | 0                     | 12 (5–26)  | 31                    | < 0.01   |
| Grade 3/4 AE*            | 11 (8–17)  | 0                     | 10 (6–17)   | -                     | 15 (7–29)  | -                     | -        |
| CNS-related grade 3/4 AE | 5 (3–8)    | 8                     | 5 (2–13)    | 54                    | 5 (2–14)   | 0                     | 0.95     |

Anti-CTLA-4 includes ipilimumab, Anti-PD-1 includes nivolumab and pembrolizumab. \*Sensitivity analysis was not available because only one study reported data regarding grade 3/4 AE when using ipilimumab and nivolumab each. Anti-CTLA-4 = cytotoxic T-lymphocyte-associated protein 4, Anti-PD-1 = programmed cell death protein 1, CR = achieving complete, DCR = disease control rate (proportion of the patients who were confirmed as CR, PR, or SD, ORR = objective response rate (proportion of the patients who were confirmed as CR or PR), PR = partial response, SD = stable disease
