# Supplementary material for: Immune Checkpoint Inhibitor with or without Radiotherapy in Melanoma Patients with Brain Metastases: A Systematic Review and Meta-Analysis
Source: PubMed Central journal article supplement — Korean J Radiol. 2020 Nov 26;22(4):584–95. doi: 10.3348/kjr.2020.0728 (PMC8005357; doi:10.3348/kjr.2020.0728), 2020-11-26
Supplement: kjr-22-584-s007.pdf [file kjr-22-584-s007.pdf]

**Supplementary Table 3. Summary of Sensitivity Analysis Regarding Mode of Radiotherapy**

| Outcome          | Total      |                       | WBRT/SRS   |                       | SRS Only   |                       | <i>P</i> |
|------------------|------------|-----------------------|------------|-----------------------|------------|-----------------------|----------|
|                  | Proportion | <i>I</i> <sup>2</sup> | Proportion | <i>I</i> <sup>2</sup> | Proportion | <i>I</i> <sup>2</sup> |          |
| Intracranial ORR | 42 (31–54) | 26                    | 27 (13–49) | -                     | 46 (36–57) | 0                     | 0.11     |
| Intracranial DCR | 85 (63–95) | 79                    | 59 (38–77) | -                     | 91 (74–97) | 64                    | 0.10     |
| Intracranial CR  | 6 (1–37)   | 69                    | 2 (0–27)   | -                     | 9 (1–59)   | 72                    | 0.56     |

SRS = stereotactic radiosurgery, WBRT = whole brain radiation therapy
